# Supplementary material
Source: PubMed Central journal article supplement (PMC2736416)
Supplement: 0907339106_0907339106SI.pdf [file 0907339106_0907339106SI.pdf]

# Supporting Information

Tamgüney et al. 10.1073/pnas.0907339106

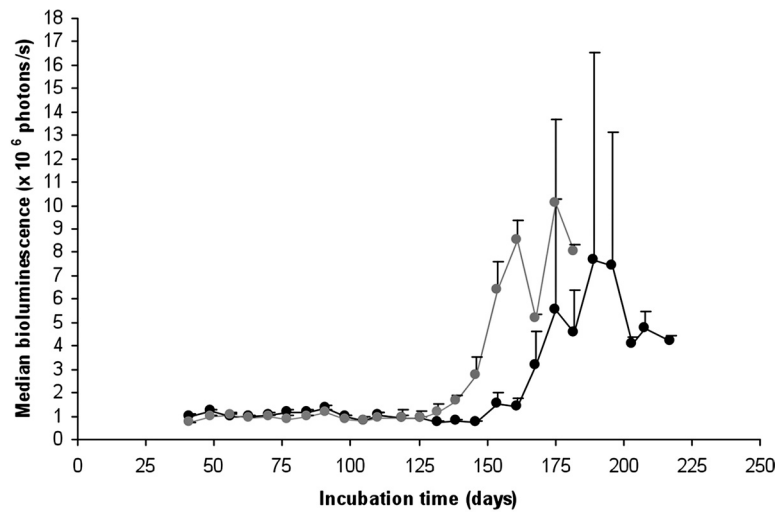

**Fig. S1.** Transgenic (Tg)(*Gfap-luc*) mice were inoculated i.p. ( $n = 12$ ) or by oral gavage ( $n = 12$ ) with a 1% RML brain homogenate. Mice inoculated i.p. developed reactive astrocytic gliosis after a median incubation time of  $129 \pm 12.4$  days postinoculation (dpi) (gray curve) and died after a median incubation time of  $167 \pm 22.3$  dpi, whereas mice inoculated by oral gavage developed reactive astrocytic gliosis after a median incubation time of  $\approx 154 \pm 9.4$  dpi and died after a median incubation time of  $\approx 216.5 \pm 5.7$  dpi. Error bars indicate the SE.

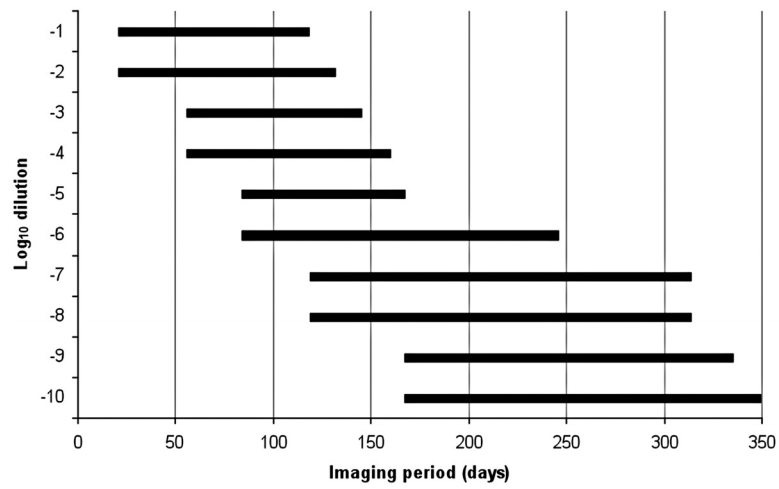

**Fig. S2.** Ten groups of 12 Tg(*Gfap-luc*) mice were inoculated with serial log dilutions, ranging from -1 to -10, of a 10% RML prion brain homogenate. Dilution-dependent imaging periods after inoculation are shown. For higher dilutions, imaging periods started and ended later.

**Table S1. Differences in scoring for clinical signs and reactive astrocytic gliosis in Tg(*Gfap-luc*) mice inoculated with prions**

| Log dilution | Clinical signs       |                    |                     |                           | Reactive astrocytic gliosis |                     |                           |
|--------------|----------------------|--------------------|---------------------|---------------------------|-----------------------------|---------------------|---------------------------|
|              | Inoculated, <i>n</i> | Censored, <i>n</i> | Evaluated, <i>n</i> | Scored positive, <i>n</i> | Censored, <i>n</i>          | Evaluated, <i>n</i> | Scored positive, <i>n</i> |
| -1           | 12                   | 1                  | 11                  | 11                        | 1                           | 11                  | 11                        |
| -2           | 12                   | 0                  | 12                  | 12                        | 0                           | 12                  | 12                        |
| -3           | 12                   | 0                  | 12                  | 12                        | 0                           | 12                  | 12                        |
| -4           | 12                   | 6                  | 6                   | 6                         | 3                           | 9                   | 9                         |
| -5           | 12                   | 2                  | 8                   | 8                         | 3                           | 9                   | 9                         |
| -6           | 12                   | 1                  | 11                  | 8                         | 1                           | 11                  | 8                         |
| -7           | 12                   | 2                  | 10                  | 3                         | 2                           | 10                  | 5 (1)                     |
| -8           | 12                   | 5                  | 7                   | 2                         | 2                           | 10                  | 7 (2)                     |
| -9           | 12                   | 2                  | 10                  | 0                         | 2                           | 10                  | 3 (3)                     |
| -10          | 12                   | 0                  | 12                  | 0                         | 0                           | 12                  | 1 (1)                     |

Numbers in parentheses indicate the number of mice that scored positive for reactive astrocytic gliosis, but not clinical signs.
